# Supplementary material for: Characterization of Aspartic Proteases from Paracoccidioides brasiliensis and Their Role in Fungal Thermo-Dimorphism
Source: MDPI journal article supplement (doi:10.3390/jof9030375), 2023-03-19
Supplement: s1 [file s1]

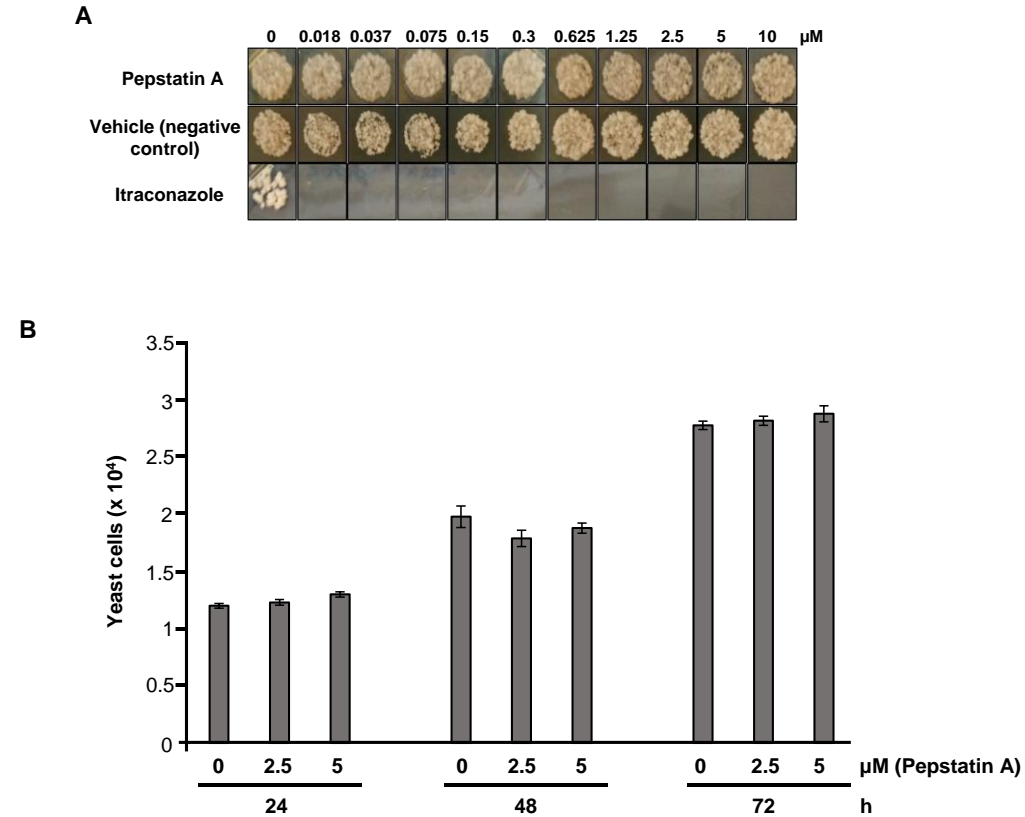

**Supplementary Figure 1. Evaluation of the cytotoxicity of Pepstatin A in *P. brasiliensis*.** **(A)** Yeast cells ( $1 \times 10^4$ ) were cultured in microplates containing RPMI medium and treated with Pepstatin A (0.018 - 10  $\mu$ M), Methanol (vehicle) or Itraconazole (0.01 - 10  $\mu$ M) (Positive Control). The culture was incubated for 7 days at 37°C and after that period 10  $\mu$ L of each point was applied in YPDmod medium and incubated again for 5 days at 37°C. **(B)** Yest cells were treated with Pepstatin A (2.5 and 5  $\mu$ M) and fungal growth was determined by counting in a Neubauer chamber. Representative data from three independent experiments.

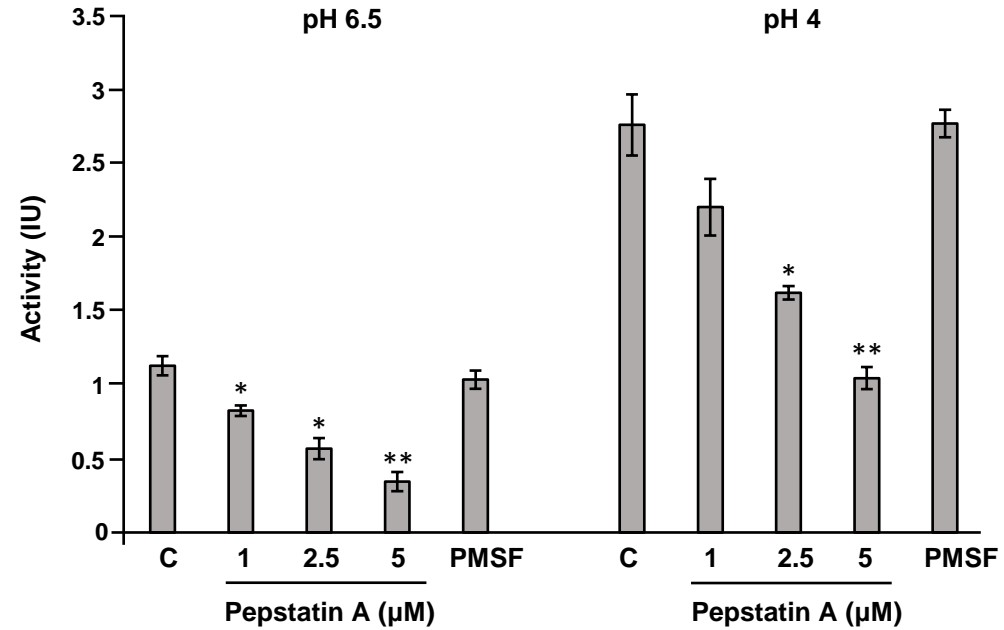

**Supplementary Figure 2. Proteolytic activity profile of acid proteases from *P. brasiliensis*.** Yeast cells were grown in YPDm with pH 6.5 or 4 for five days. Proteolytic activity was measured using 3  $\mu\text{g}$  *P. brasiliensis* protein extract and 80  $\mu\text{L}$  of 7.5  $\mu\text{M}$  bovine serum albumin (BSA) in 0.1 M citric acid/sodium phosphate, pH 3.3, and incubated at 50°C. Samples were incubated in the presence or absence of Pepstatin A (1, 2.5 and 5  $\mu\text{M}$ ) or PMSF (100  $\mu\text{M}$ ). Then, 20  $\mu\text{L}$  was removed after 30 min and added to 180  $\mu\text{L}$  of Coomassie Plus<sup>TM</sup> protein assay reagent (Pierce) in a microtiter plate. Absorbance was read at 590 nm, and activity (IU) was calculated relative to BSA degradation using a standard curve. One IU is defined as degradation of 1  $\mu\text{mol}$  of BSA  $\text{min}^{-1}.\text{ml}^{-1}$ . \* $p \leq 0.05$  and \*\* $p \leq 0.01$ . The results shown are representative of two independent experiments.
